# Supplementary material
Source: PubMed Central journal article supplement (PMC7768816)

Figure S1: Percentage of eligible participants excluded because they do not have a coded cancer feature (green) or only have a suspected-cancer code (red) in the year before diagnosis (2006 to 2017), for bladder, breast, colorectal, lung, myeloma, oesophagus, ovary, pancreas, prostate, stomach and uterus. Only participants with a code for a cancer-specific feature (blue bars) were included in the analyses

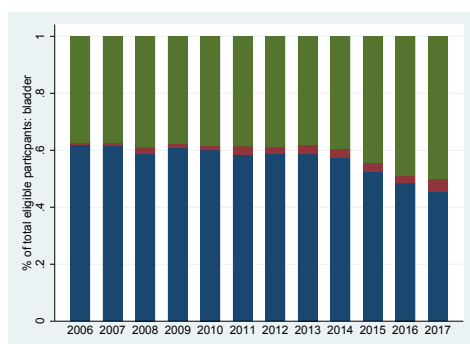

(a) bladder

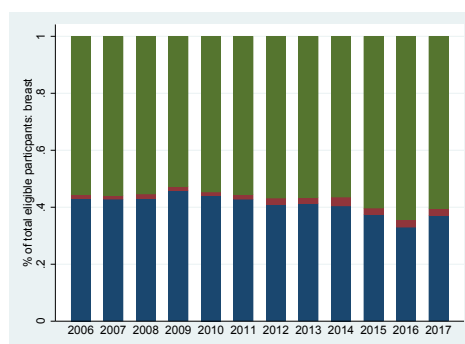

(b) breast

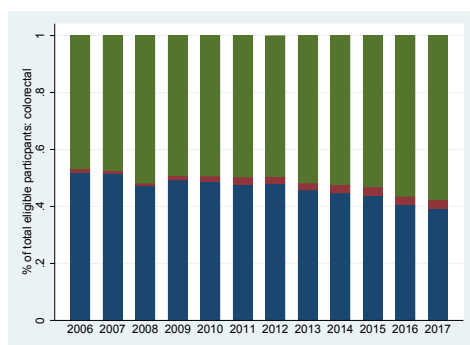

(c) colorectal

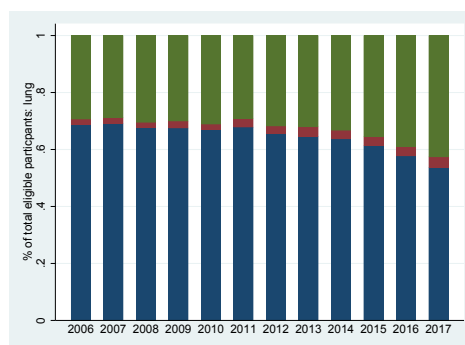

(d) lung

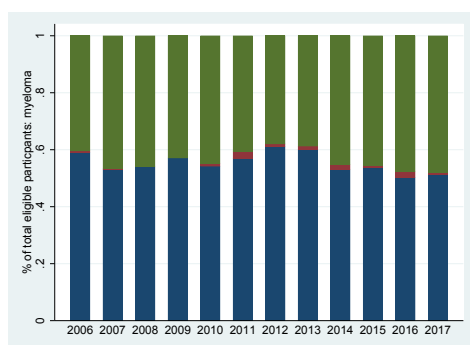

(e) myeloma

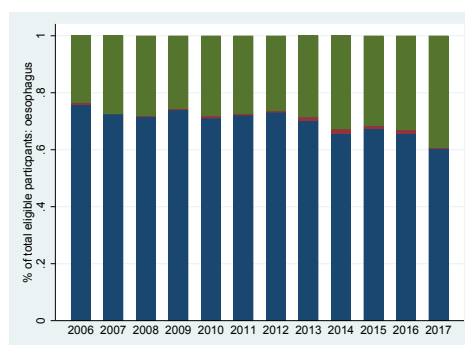

(f) oesophagus

Figure S1: cont.

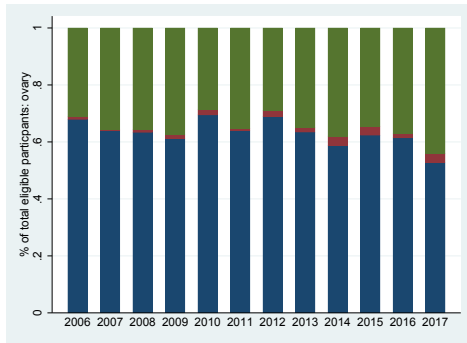

(g) ovary

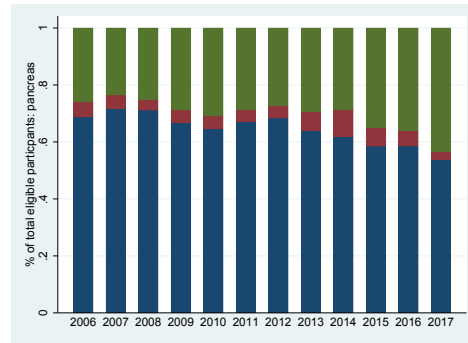

(h) pancreas

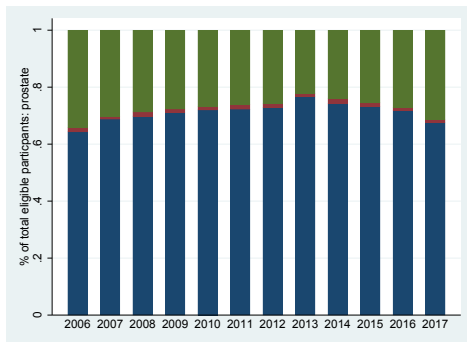

(i) prostate

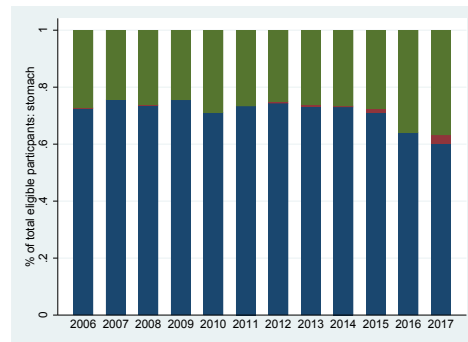

(j) stomach

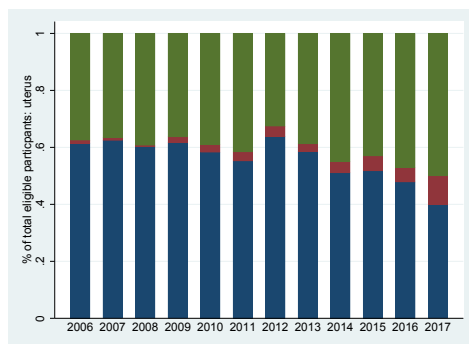

(k) uterus

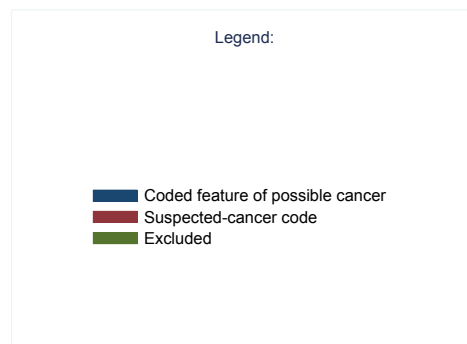

Supplement: mmc1.pdf [file mmc1.pdf]
